# Supplementary material for: Prognostic Factors to Predict ICU Mortality in Patients with Severe ARDS Who Received Early and Prolonged Prone Positioning Therapy
Source: MDPI journal article supplement (doi:10.3390/jcm10112323), 2021-05-26
Supplement: s1 [file s1]

**Supplement Table 1.** ROC curve analysis of parameters with significant differences between the survivors and nonsurvivors

| Characteristics | AUC   | <i>p</i> value | Cut-off point | Sensitivity | Specificity | Accuracy | PPV  | NPV  |
|-----------------|-------|----------------|---------------|-------------|-------------|----------|------|------|
| Prone score     | 0.816 | <0.001**       | ≥3            | 75.0        | 82.7        | 78.5     | 84.2 | 72.9 |
| Age             | 0.668 | 0.001**        | ≥53           | 89.1        | 44.2        | 69.0     | 66.3 | 76.7 |
| APACHE II       | 0.623 | 0.018 *        | ≥33           | 48.4        | 76.9        | 61.2     | 72.1 | 54.8 |

APACHE II: Acute Physiology and Chronic Health Evaluation I; AUC, area under the curve; NPV, negative predictive value; PPV, positive predictive value; ROC, receiver operating characteristic. \**p* < 0.05, \*\**p* < 0.01.
